# Supplementary material
Source: PubMed Central journal article supplement (PMC2872412)
Supplement: 1002295107_pnas.1002295107_SI.pdf [file 1002295107_pnas.1002295107_SI.pdf]

# Supporting Information

Koharudin et al. 10.1073/pnas.1002295107

## SI Text

**15d-PGJ2 Does Not Modify Every Cys Containing Protein.** It has been assumed that any free protein thiol group may act as a nucleophile in the reaction with the electrophilic carbonyl moiety of the 15d-PGJ2 cyclopentenone ring. However, our results with the UCH-L1 Cys mutants contradict this notion. In order to probe this issue further, we selected two other completely unrelated proteins and subjected them to incubation with 15d-PGJ2, namely LKAMG (1), a designer lectin with a single, solvent exposed Cys and SERCA (Sarco(endo)plasmic reticulum  $\text{Ca}^{2+}$  AT-Pase) (2), containing six Cys residues with free thiol groups. No changes in the 2D  $^1\text{H}$ - $^{15}\text{N}$  HSQC spectra were observed after treatment with a twofold molar excess of 15d-PGJ2 (Fig. S7), indicating that no prostaglandin conjugation had occurred.

LC-ESI-MS analysis confirmed that only unmodified, free protein was present.

The extensive aggregation of UCH-L1 upon conjugation with 15d-PGJ2 in vitro raises the question whether this event is physiologically relevant. Normal concentrations of prostaglandins in body fluids were found to be in pico- to nanomolar range (3), although it could well be that substantially increased levels of prostaglandins may be reached at the site of damage under pathological conditions, such as oxidative stress and inflammation (4). Although our NMR titration experiments were carried out at  $\sim 200$  micromolar protein concentrations, unfolding is observed with substoichiometric amounts of 15d-PGJ2. Thus, the structure gets destroyed and aggregation occurs as soon as the protein is modified.

1. Koharudin LMI, Furey W, & Gronenborn AM (2009) A designed chimeric cyanovirin-N homolog lectin: Structure and molecular basis of sucrose binding. *Proteins* 77:904–915.
2. Olesen C, et al. (2007) The structural basis of calcium transport by the calcium pump. *Nature* 450:1036–1042.
3. Fukushima M (1990) Prostaglandin J2-anti-tumour and antiviral activities and the mechanisms involved. *Eicosanoids* 3:189–199.
4. Herschman HR, Reddy ST, & Xie W (1997) Function and regulation of prostaglandin synthase-2. *Adv Exp Med Biol* 407:61–66.

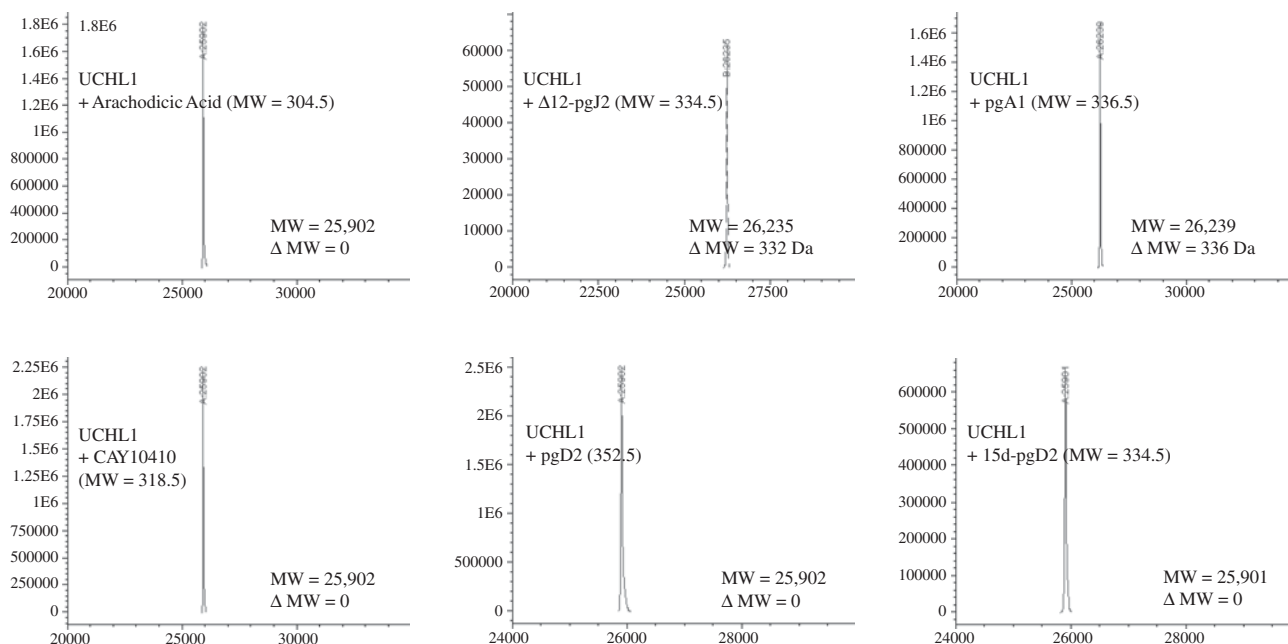

**Fig. S1.** ESI-MS analysis of UCH-L1 modification by arachidonic acid and various other prostaglandins. Species with a mass increase of 332 and 336 Da were only observed for  $\Delta$ 12-PGJ2 (334.5) and PGA1 (335.5), respectively, and no mass increase was observed for addition of arachidonic acid, CAY10410, PGD2, and 15d-PGD2, indicating that UCH-L1 is conjugated only by cyclopentenone prostaglandins of the A and J series.
